# Supplementary material for: Burden of SARS-CoV-2 and protection from symptomatic second infection in children
Source: PubMed Central journal article supplement — medRxiv. 2022 Jan 5:2022.01.03.22268684. Preprint. [Version 1] doi: 10.1101/2022.01.03.22268684 (PMC8750653; doi:10.1101/2022.01.03.22268684), 2022-01-05

**Supplement to: Burden of SARS-CoV-2 and Protection from Symptomatic Secondary  
Infection in Children**

**Table of Contents:**

Page 3) Case definitions

Page 4) Supplemental Table 1: Incidence of COVID-19 Associated Hospitalization

Page 5) Supplemental Table 2: Symptom presentation of COVID-19 cases by age

Page 6) Supplemental Table 3: Risk of moderate or severe COVID-19 by sero-status

Page 6) Supplemental Table 4: SARS-CoV-2 Illness Severity

Page 7) Supplemental Figure 1: IgG titers by sex

Page 8) Supplemental Figure 2: Incidence rate ratios of COVID-19 associated hospitalization

**Case Definitions:**

| Term              |             | Definition                                                                                                                                                                                                                                                                                                                                                                                                                                                                                                                            |
|-------------------|-------------|---------------------------------------------------------------------------------------------------------------------------------------------------------------------------------------------------------------------------------------------------------------------------------------------------------------------------------------------------------------------------------------------------------------------------------------------------------------------------------------------------------------------------------------|
| COVID-19 case     |             | RT-PCR positive for SARS-CoV-2 and no prior positive within previous 59 days                                                                                                                                                                                                                                                                                                                                                                                                                                                          |
| Primary episode   |             | RT-PCR-confirmed case of COVID-19 in participant with no prior positive via PCR or ELISA<br>OR<br>RT-PCR-confirmed case of COVID-19 in participant with prior ELISA positive<br>AND<br>age <6 months at time of ELISA positive                                                                                                                                                                                                                                                                                                        |
| Secondary episode |             | RT-PCR-confirmed case of COVID-19 in participant with prior ELISA positive<br>AND<br>age ≥ 6 months at time of ELISA positive<br>OR<br>RT-PCR-confirmed case of COVID-19 in participant with prior RT-PCR-confirmed case of COVID-19 occurring >59 days prior.                                                                                                                                                                                                                                                                        |
| Severity          | Subclinical | No reported symptoms                                                                                                                                                                                                                                                                                                                                                                                                                                                                                                                  |
|                   | Mild        | 1 or more of the following symptoms: <ul style="list-style-type: none"> <li>• loss of taste</li> <li>• loss of smell</li> <li>• runny nose</li> <li>• cough</li> <li>• headache</li> <li>• sore throat</li> <li>• joint pain</li> <li>• fever</li> <li>• muscle pain</li> <li>• diarrhea</li> <li>• fatigue</li> <li>• rash</li> <li>• stayed in bed</li> <li>• conjunctivitis</li> <li>• congestion</li> <li>• itchy throat</li> <li>• loss of appetite</li> <li>• faintness</li> <li>• tight chest</li> <li>• chest pain</li> </ul> |
|                   | Moderate    | Any of the following symptoms: <ul style="list-style-type: none"> <li>• difficulty breathing</li> <li>• rapid breathing</li> <li>• shortness of breath</li> </ul>                                                                                                                                                                                                                                                                                                                                                                     |
|                   | Severe      | Transfer to hospital                                                                                                                                                                                                                                                                                                                                                                                                                                                                                                                  |
| Long COVID        |             | Participants with any symptom persisting for at least 28 days following illness onset for confirmed COVID-19                                                                                                                                                                                                                                                                                                                                                                                                                          |

**Supplemental Table 1: Incidence of COVID-19 Associated Hospitalization**

| <b>Characteristic</b> |             | <b>N=12</b> | <b>Incidence Rate per 100 person-years</b> |
|-----------------------|-------------|-------------|--------------------------------------------|
| Male                  |             | 7(58.3)     | 0.5 (0.2, 1.1)                             |
| Female                |             | 5(41.7)     | 0.4 (0.1, 0.9)                             |
| Age                   | <2 years    | 7(58.3)     | 1.7 (0.7, 3.5)                             |
|                       | 2-4 years   | 3(25.0)     | 0.6 (0.1, 1.6)                             |
|                       | 5-9 years   | 2(16.7)     | 0.2 (0.03, 0.8)                            |
|                       | 10-14 years | 0           | --                                         |

<sup>a</sup>Confidence intervals calculated using Poisson distribution.

**Supplemental Table 2: Symptom presentation of COVID-19 cases by age**

| <b>Characteristic</b> | <b>&lt;2 years,<br/>N = 66<sup>a</sup></b> | <b>2-4 years,<br/>N = 30<sup>a</sup></b> | <b>5-9 years,<br/>N = 52<sup>a</sup></b> | <b>10-14 years, N<br/>= 59<sup>a</sup></b> | <b>Overall,<br/>N = 207<sup>a</sup></b> |
|-----------------------|--------------------------------------------|------------------------------------------|------------------------------------------|--------------------------------------------|-----------------------------------------|
| Loss of taste         | 0 (0)                                      | 0 (0)                                    | 3 (5.8)                                  | 8 (14)                                     | 11 (5.3)                                |
| Loss of smell         | 0 (0)                                      | 0 (0)                                    | 3 (5.8)                                  | 11 (19)                                    | 14 (6.8)                                |
| Runny nose            | 48 (73)                                    | 26 (87)                                  | 37 (71)                                  | 44 (75)                                    | 155 (75)                                |
| Cough                 | 48 (73)                                    | 23 (77)                                  | 36 (69)                                  | 41 (69)                                    | 148 (71)                                |
| Headache              | 0 (0)                                      | 6 (20)                                   | 24 (46)                                  | 37 (63)                                    | 67 (32)                                 |
| Sore throat           | 3 (4.5)                                    | 7 (23)                                   | 26 (50)                                  | 28 (47)                                    | 64 (31)                                 |
| Fever/feverish        | 46 (70)                                    | 20 (67)                                  | 35 (67)                                  | 38 (64)                                    | 139 (67)                                |
| Joint pain            | 0 (0)                                      | 1 (3.3)                                  | 3 (5.8)                                  | 14 (24)                                    | 18 (8.7)                                |
| Muscle pain           | 0 (0)                                      | 2 (6.7)                                  | 6 (12)                                   | 15 (25)                                    | 23 (11)                                 |
| Diarrhea              | 19 (29)                                    | 3 (10)                                   | 10 (19)                                  | 6 (10)                                     | 38 (18)                                 |
| Vomiting              | 5 (7.6)                                    | 0 (0)                                    | 4 (7.7)                                  | 3 (5.1)                                    | 12 (5.8)                                |
| Fatigue               | 0 (0)                                      | 0 (0)                                    | 0 (0)                                    | 1 (1.7)                                    | 1 (0.5)                                 |
| Rash                  | 1 (1.5)                                    | 1 (3.3)                                  | 0 (0)                                    | 1 (1.7)                                    | 3 (1.4)                                 |
| Stayed in bed         | 0 (0)                                      | 0 (0)                                    | 1 (1.9)                                  | 1 (1.7)                                    | 2 (1.0)                                 |
| Conjunctivitis        | 0 (0)                                      | 0 (0)                                    | 0 (0)                                    | 0 (0)                                      | 0 (0)                                   |
| Congestion            | 30 (45)                                    | 14 (47)                                  | 23 (44)                                  | 23 (39)                                    | 90 (43)                                 |
| Itchy throat          | 1 (1.5)                                    | 0 (0)                                    | 3 (5.8)                                  | 5 (8.5)                                    | 9 (4.3)                                 |
| Loss of appetite      | 15 (23)                                    | 11 (37)                                  | 17 (33)                                  | 7 (12)                                     | 50 (24)                                 |
| Fainted               | 0 (0)                                      | 0 (0)                                    | 0 (0)                                    | 0 (0)                                      | 0 (0)                                   |
| Difficulty breathing  | 3 (4.5)                                    | 2 (6.7)                                  | 4 (7.7)                                  | 3 (5.1)                                    | 12 (5.8)                                |
| Rapid breathing       | 4 (6.1)                                    | 1 (3.3)                                  | 2 (3.8)                                  | 0 (0)                                      | 7 (3.4)                                 |
| Shortness of breath   | 0 (0)                                      | 0 (0)                                    | 1 (1.9)                                  | 2 (3.4)                                    | 3 (1.4)                                 |
| Chest tightness       | 1 (1.5)                                    | 0 (0)                                    | 0 (0)                                    | 1 (1.7)                                    | 2 (1.0)                                 |
| Chest pain            | 0 (0)                                      | 0 (0)                                    | 0 (0)                                    | 3 (5.1)                                    | 3 (1.4)                                 |

<sup>a</sup>N(%)

**Supplemental Table 3: Risk of moderate or severe COVID-19 by sero-status**

|              | <b>N=10</b> | <b>Person-years</b> | <b>IRR<sup>a</sup></b> |
|--------------|-------------|---------------------|------------------------|
| Seropositive | 5           | 578.2               | 0.9 (0.3, 3.2)         |
| Seronegative | 5           | 515.1               | --                     |

<sup>a</sup>Incidence Rate Ratio (95% confidence interval)

**Supplemental Table 4: SARS-CoV-2 Illness Severity**

| <b>Characteristic</b> | <b>Subclinical</b> | <b>Mild</b> | <b>Moderate</b> | <b>Severe</b> | <b>Total</b> |
|-----------------------|--------------------|-------------|-----------------|---------------|--------------|
| Female                | 409 (73.6)         | 131 (23.6)  | 11 (2.0)        | 5 (0.9)       | 556          |
| Male                  | 382 (74.5)         | 112 (21.8)  | 12 (2.3)        | 7 (1.4)       | 513          |
| Age                   |                    |             |                 |               |              |
| <2 years              | 128 (65.3)         | 58 (29.6)   | 3 (1.5)         | 7 (3.6)       | 196          |
| 2-4 years             | 148 (79.6)         | 32 (17.2)   | 3 (1.6)         | 3 (1.6)       | 186          |
| 5-9 years             | 254 (77.2)         | 65 (19.8)   | 8 (2.4)         | 2 (0.6)       | 329          |
| 10-14 years           | 261 (72.9)         | 88 (24.6)   | 9 (2.5)         | 0 (0.0)       | 358          |
| Total                 | 791 (74.0)         | 243 (22.7)  | 23 (2.2)        | 12 (1.1)      | 1069         |

<sup>1</sup> Values correspond to N(%)

Supplemental Figure 1: Anti SARS-CoV-2 IgG titers by sex

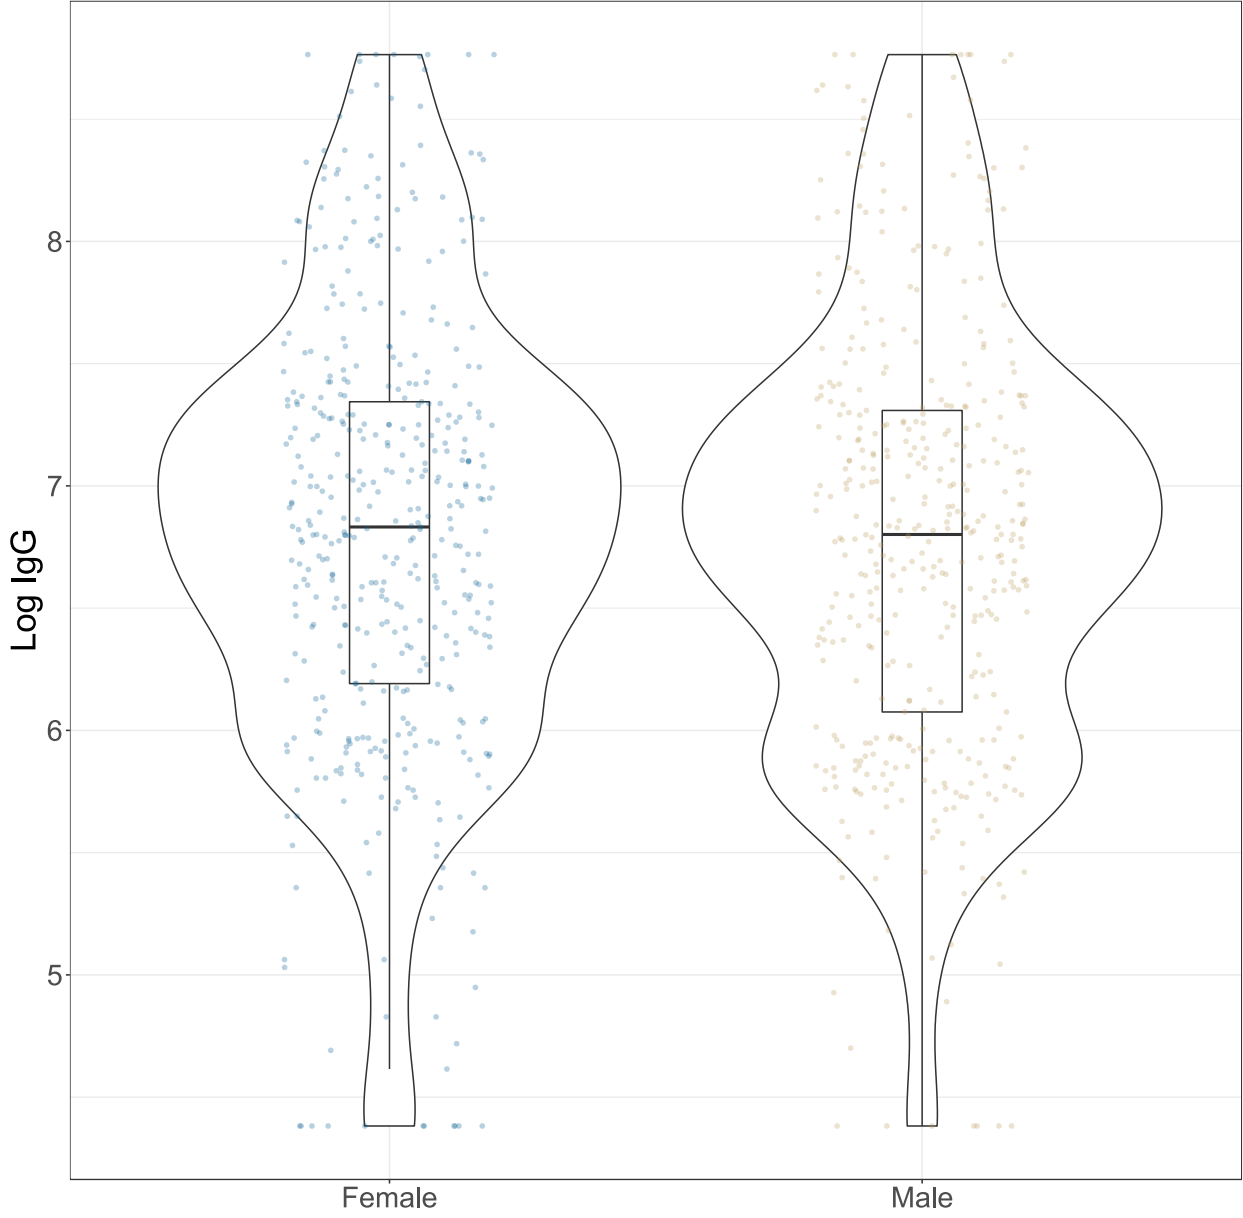

Supplemental Figure 2: Incidence rate ratios of COVID-19 associated hospitalization

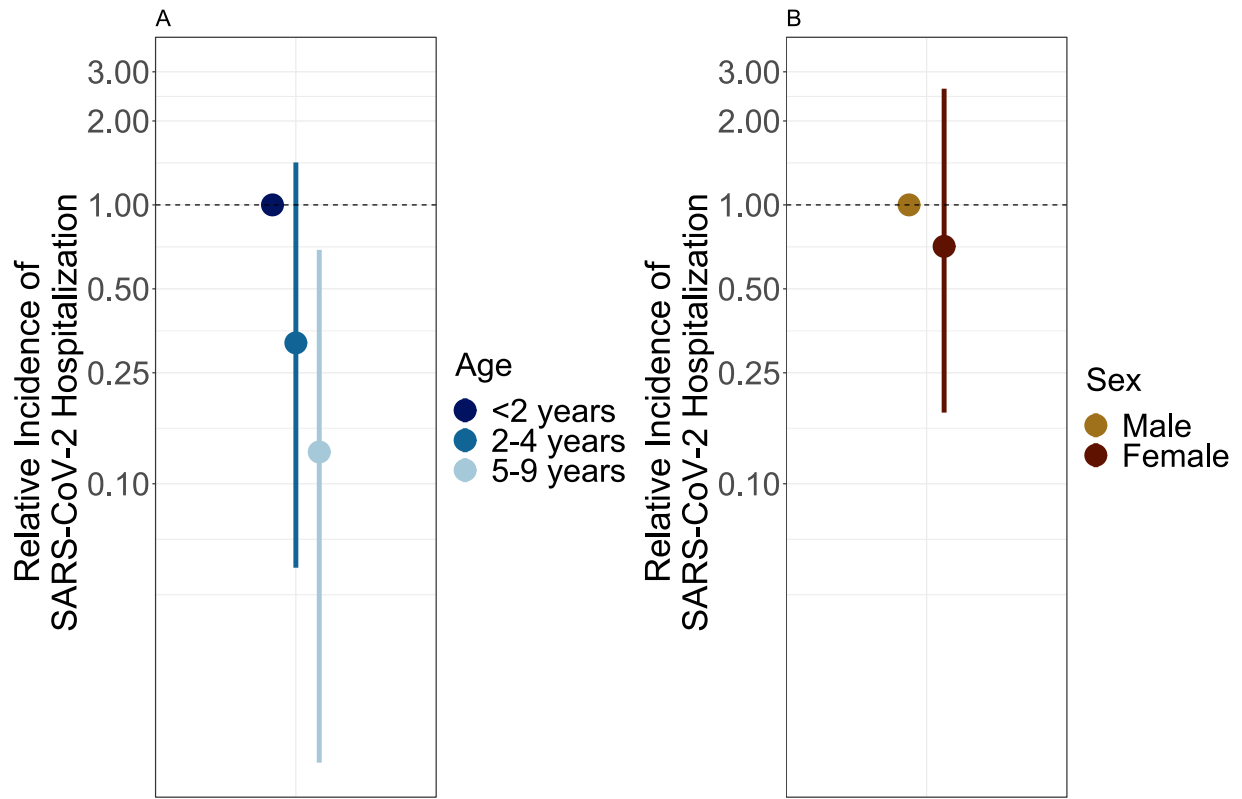

Supplement: media-1.pdf [file media-1.pdf]
